# Supplementary figures and images for: Clinical Use of Colistin Induces Cross-Resistance to Host Antimicrobials in Acinetobacter baumannii
Source: PubMed Central journal article supplement — mBio. 2013 May 21;4(3):e00021-13. doi: 10.1128/mBio.00021-13 (PMC3663567; doi:10.1128/mbio.00021-13), 2013-05-21

A

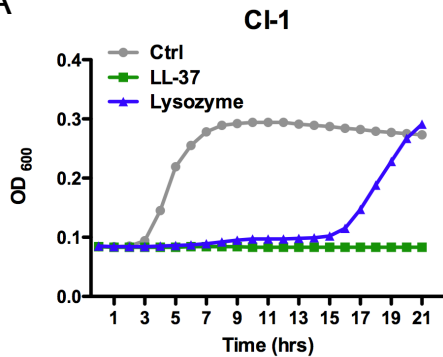

B

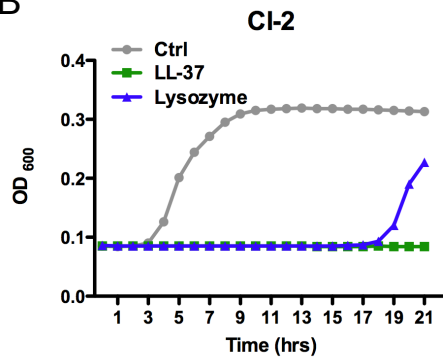

C

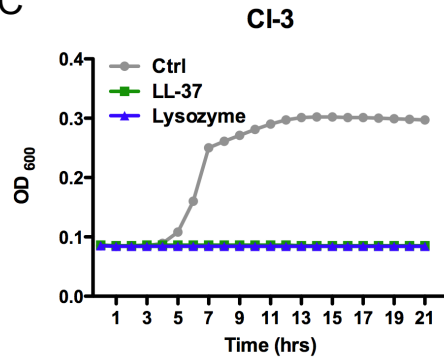

D

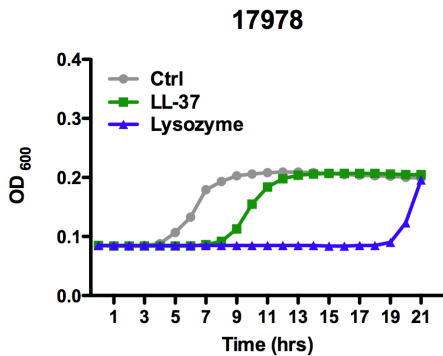

E

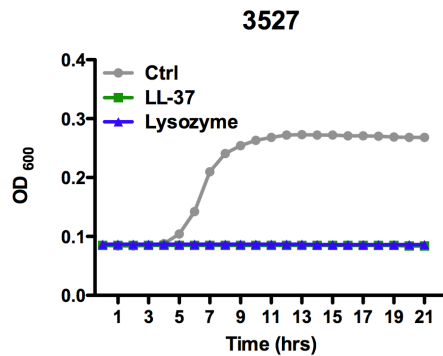

F

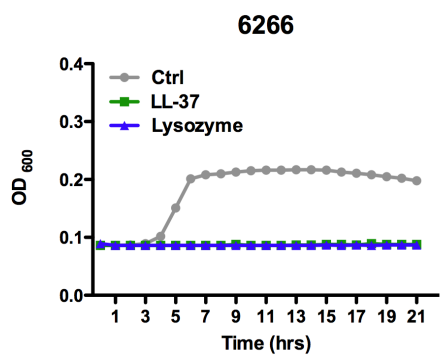

Supplement: mbo003131528sf01.pdf [file mbo003131528sf01.pdf]
